# Supplementary material
Source: HighWire-hosted journal article supplement (https://spcare.bmj.com/content/bmjspcare-2019-002141)
Supplement: inline-supplementary-material-1 [file inline-supplementary-material-1.pdf]

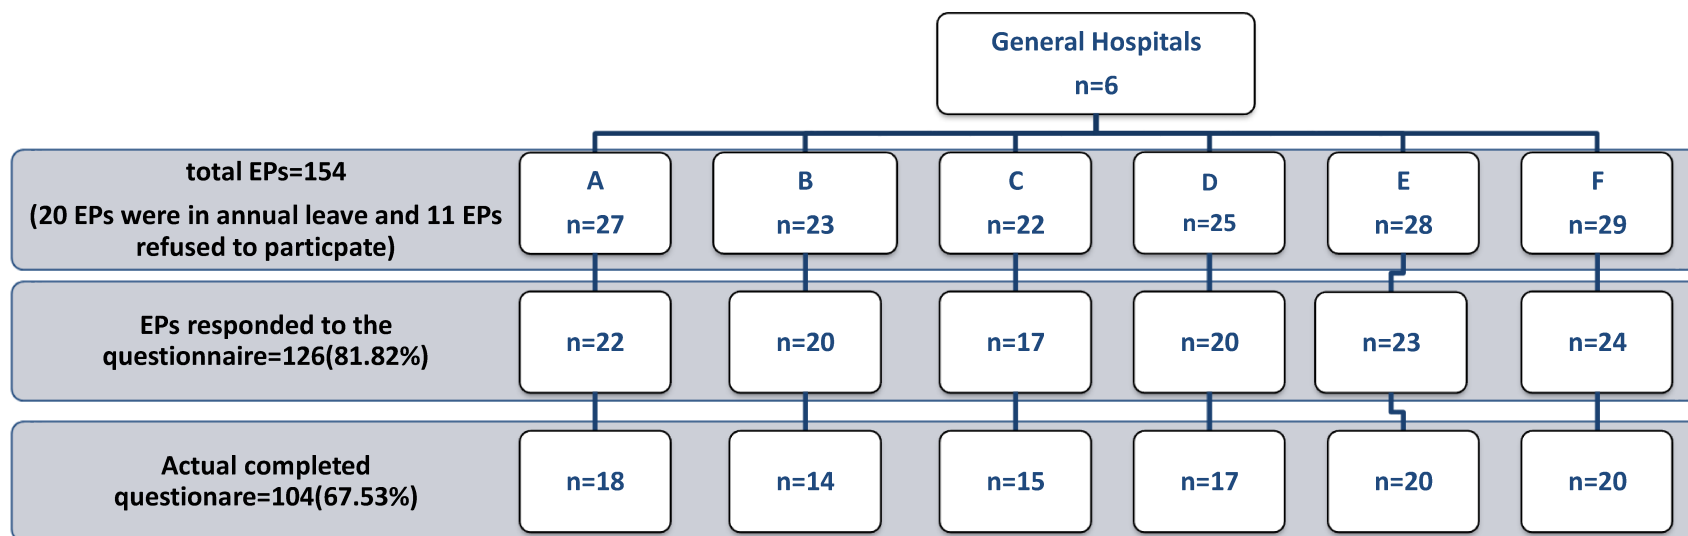

Figure S1: The Flowchart for the sampling procedure

EPs: emergency physicians

Hospital (A): Mubarak AlKabeer, Hospital (B): AlAdan, Hospital (C): AlSabah, Hospital (D): Al-Jahra, Hospital (E): Al-Farawanyia, Hospital (F): Al-Amiri
