# Supplementary material
Source: HighWire-hosted journal article supplement (https://spcare.bmj.com/content/bmjspcare-2019-002141)
Supplement: inline-supplementary-material-3 [file inline-supplementary-material-3.pdf]

**Table S2: Distributions of the emergency physicians' attitude towards palliative care in Kuwait**

|                                                                                                                |                   | Total<br>(n=104) | experience<br><11yrs(n=50) | experience<br>≥11yrs(n=54) | p-<br>value* |
|----------------------------------------------------------------------------------------------------------------|-------------------|------------------|----------------------------|----------------------------|--------------|
| Q1-I have been dissatisfied with PC services in the past                                                       | Positive attitude | 16(15.4%)        | 5(10%)                     | 11(20.4%)                  | 0.232        |
|                                                                                                                | Negative attitude | 61(58.7%)        | 29(58%)                    | 32(59.3%)                  |              |
|                                                                                                                | Not sure          | 27(26%)          | 16(32%)                    | 11(20.4%)                  |              |
| Q2-I feel there is a lack of timely communication between PC providers and myself.                             | Positive attitude | 10(9.6%)         | 5(10%)                     | 5(9.35)                    | 0.992        |
|                                                                                                                | Negative attitude | 71(68.3%)        | 34(68%)                    | 37(68.5%)                  |              |
|                                                                                                                | Not sure          | 22(21.2%)        | 11(22%)                    | 12(22.2%)                  |              |
| Q3- I am not familiar with PC services in this community.                                                      | Positive attitude | 17(16.3%)        | 6(12%)                     | 11(20.4%)                  | 0.358        |
|                                                                                                                | Negative attitude | 65(62.5%)        | 31(62%)                    | 34(63%)                    |              |
|                                                                                                                | Not sure          | 22(21.2%)        | 13(26%)                    | 9(16.7%)                   |              |
| Q4-I am uncertain of the length of coverage under the PC benefit.                                              | Positive attitude | 13(12.5%)        | 4(8%)                      | 9(16.7%)                   | 0.006        |
|                                                                                                                | Negative attitude | 56(53.8%)        | 35(70%)                    | 21(38.9%)                  |              |
|                                                                                                                | Not sure          | 35(33.7%)        | 11(22%)                    | 24(44.4%)                  |              |
| Q5- I am uncertain of the type of services covered under the PC benefit.                                       | Positive attitude | 13(12.5%)        | 7(14%)                     | 6(11.1%)                   | 0.925        |
|                                                                                                                | Negative attitude | 54(51.9%)        | 26(52%)                    | 28(51.9%)                  |              |
|                                                                                                                | Not sure          | 37(35.6%)        | 17(34%)                    | 20(37%)                    |              |
| Q6- Patients or families are unwilling or unready to elect PC services.                                        | Positive attitude | 29(27.9%)        | 15(30%)                    | 14(25.9%)                  | 0.910        |
|                                                                                                                | Negative attitude | 33(31.7%)        | 15(30%)                    | 18(33.3%)                  |              |
|                                                                                                                | Not sure          | 42(40.4%)        | 20(40%)                    | 22(40.7%)                  |              |
| Q7- All adults and children who are terminally ill are candidates for PC services, not just those with cancer. | Positive attitude | 65(62.5%)        | 29(58%)                    | 36(66.7%)                  | 0.561        |
|                                                                                                                | Negative attitude | 11(10.6%)        | 5(10%)                     | 6(11.1%)                   |              |
|                                                                                                                | Not sure          | 28(26.9%)        | 16(32%)                    | 12(22.2%)                  |              |
| Q8-Patients receiving radiation for palliation of symptoms are not candidates for PC.                          | Positive attitude | 49(47.1%)        | 10(20%)                    | 13(24.1%)                  | 0.691        |
|                                                                                                                | Negative attitude | 23(22.1%)        | 26(52%)                    | 23(42.6%)                  |              |
|                                                                                                                | Not sure          | 32(30.8%)        | 12(28%)                    | 18(33.3%)                  |              |
| Q9- PC benefits include enhanced quality of life for the patient and family.                                   | Positive attitude | 81(77.9%)        | 39(78%)                    | 42(77.8%)                  | 0.763**      |
|                                                                                                                | Negative attitude | 6(5.8%)          | 2(4%)                      | 4(7.4%)                    |              |
|                                                                                                                | Not sure          | 17(16.3%)        | 9(18%)                     | 8(14.8%)                   |              |
| Q10-PC benefits include skilled care for terminally ill patients.                                              | Positive attitude | 82(78.8%)        | 42(84%)                    | 40(74.1%)                  | 0.091**      |
|                                                                                                                | Negative attitude | 5(4.8%)          | 0(0%)                      | 5(9.35)                    |              |
|                                                                                                                | Not sure          | 17(16.3%)        | 8(16%)                     | 9(16.7%)                   |              |
| Q11-PC benefits include expert pain and symptom management.                                                    | Positive attitude | 85(81.7%)        | 40(80%)                    | 45(83.3%)                  | 0.608**      |
|                                                                                                                | Negative attitude | 4(3.8%)          | 3(6%)                      | 1(1.9%)                    |              |
|                                                                                                                | Not sure          | 15(14.4%)        | 7(14%)                     | 8(14.8%)                   |              |

PC: palliative care.\* p-value < 0.05 is significant.

\*\* : Fisher Exact

**Table S3: Distributions of the emergency physicians' knowledge towards palliative care in Kuwait**

|                                   |             | Total(N=104) | experience<br><11yrs(n=50) | experience<br>≥11yrs(n=54) | <i>p</i> -<br>value* |
|-----------------------------------|-------------|--------------|----------------------------|----------------------------|----------------------|
| Knowledge                         | Total score | 5.68(2.5)    | 5.92(2.20)                 | 5.46(2.68)                 | 0.347                |
| Objective assessment              |             |              |                            |                            |                      |
| 4- PC Definition                  | True        | 79(76%)      | 43(86%)                    | 36(66.7%)                  | 0.024                |
|                                   | False       | 25(24%)      | 7(14%)                     | 18(33.3%)                  |                      |
| 5- Members of PC team             | True        | 83(79.8%)    | 43(86%)                    | 40(74.1%)                  | 0.149                |
|                                   | False       | 21(20.2%)    | 7(14%)                     | 14(25.9%)                  |                      |
| 6- Weak Opioids                   | True        | 57(54.8%)    | 28(56%)                    | 29(46.3%)                  | 0.846                |
|                                   | False       | 47(45.2%)    | 22(44%)                    | 25(46.3%)                  |                      |
| 7- Delirium                       | True        | 62(59.6%)    | 33(66%)                    | 29(53.7%)                  | 0.234                |
|                                   | False       | 42(40.4%)    | 17(34%)                    | 25(46.3%)                  |                      |
| 8- Dyspnea                        | True        | 18(17.3%)    | 9(18%)                     | 9(16.7%)                   | 0.857                |
|                                   | False       | 86(82.7%)    | 41(82%)                    | 45(83.3%)                  |                      |
| 9- Hypercalcaemia                 | True        | 65(62.5%)    | 29(58%)                    | 36(66.7%)                  | 0.420                |
|                                   | False       | 39(37.5%)    | 21(42%)                    | 18(33.3%)                  |                      |
| 10- WHO pain management<br>ladder | True        | 39(37.5%)    | 21(42%)                    | 18(33.3%)                  | 0.420                |
|                                   | False       | 65(62.5%)    | 29(58%)                    | 36(66.7%)                  |                      |
| 11- Opioid toxicity               | True        | 31(29.8%)    | 20(40%)                    | 11(20.4%)                  | 0.029                |
|                                   | False       | 73(70.2%)    | 30(60%)                    | 43(79.6%)                  |                      |
| 12- SVC obstruction               | True        | 25(24%)      | 6(12%)                     | 19(35.2%)                  | 0.011                |
|                                   | False       | 79(75.9%)    | 44(88%)                    | 35(64.8%)                  |                      |
| 13- Catastrophic bleeding         | True        | 20(19.2%)    | 10(20%)                    | 10(18.5%)                  | 0.848                |
|                                   | False       | 84(80.8%)    | 40(80%)                    | 44(81.5%)                  |                      |
| 14- Spinal cord<br>compression    | True        | 94(90.4%)    | 45(90%)                    | 49(90.7%)                  | 0.999**              |
|                                   | False       | 10(9.6%)     | 5(10%)                     | 5(9.3%)                    |                      |
| 15- Oral opioids                  | True        | 19(18.3%)    | 9(18%)                     | 10(18.5%)                  | 0.945                |
|                                   | False       | 85(81.7%)    | 41(82%)                    | 44(81.5%)                  |                      |

PC: palliative care, WHO: World Health Organization, SVC: superior venacaval obstruction. \**p* -value < 0.05 is significant

\*\**Fisher Exact*

**Table S4: Generalized linear model of predictors of positive attitude:**

|                                             | $\beta$      | SE           | OR           | 95% CI       |              | <i>p</i> -value |
|---------------------------------------------|--------------|--------------|--------------|--------------|--------------|-----------------|
|                                             |              |              |              | Lower        | Upper        |                 |
| Sex (male)                                  | 0.641        | 0.805        | 1.899        | 0.392        | 9.194        | 0.426           |
| Age                                         | 0.025        | 0.038        | 1.026        | 0.953        | 1.104        | 0.501           |
| Nationality (Kuwaiti)                       | 0.393        | 0.809        | 1.482        | 0.304        | 7.233        | 0.627           |
| Qualification (master, MBBS)                | 0.621        | 1.01         | 0.538        | 0.075        | 3.877        | 0.538           |
| Position (assistant registrar or registrar) | 0.419        | 1.19         | 0.658        | 0.064        | 6.752        | 0.724           |
| Subspecialty                                | 0.399        | 0.567        | 0.538        | 0.075        | 3.877        | 0.538           |
| Years of experience                         | 1.75         | 0.756        | 5.747        | 1.031        | 25.00        | 0.021           |
| <b>Basic knowledge score</b>                | <b>0.377</b> | <b>0.122</b> | <b>1.458</b> | <b>1.148</b> | <b>1.851</b> | <b>0.002</b>    |

\* *p*-value < 0.05 is significant

$\beta$ : beta

SE: standard error

OR: Odds Ratio

CI: Confidence interval
